# Supplementary material
Source: PubMed Central journal article supplement (PMC10243785)
Supplement: NIHMS1840948-supplement-Figure_S17.pdf [file NIHMS1840948-supplement-Figure_S17.pdf]

402 3.4 Dynamic imaging of drosophila larva

403 In live imaging experiments, we used 3rd instar larvae of the standard laboratory wild-type  
 404 *Drosophila melanogaster* (Canton-S strain). Flies were raised on cornmeal agar media with a  
 405 12h light/dark cycle at 25°C and 50% relative humidity. All experimental protocols were  
 406 approved by the Stanford Institutional Review Board (Protocol #48409), and all methods  
 407 were carried out in accordance with relevant guidelines and regulations. **Visualization 1**  
 408 shows dynamic imaging of heartbeat, digestive system, and muscle motion.  
 409  
 410

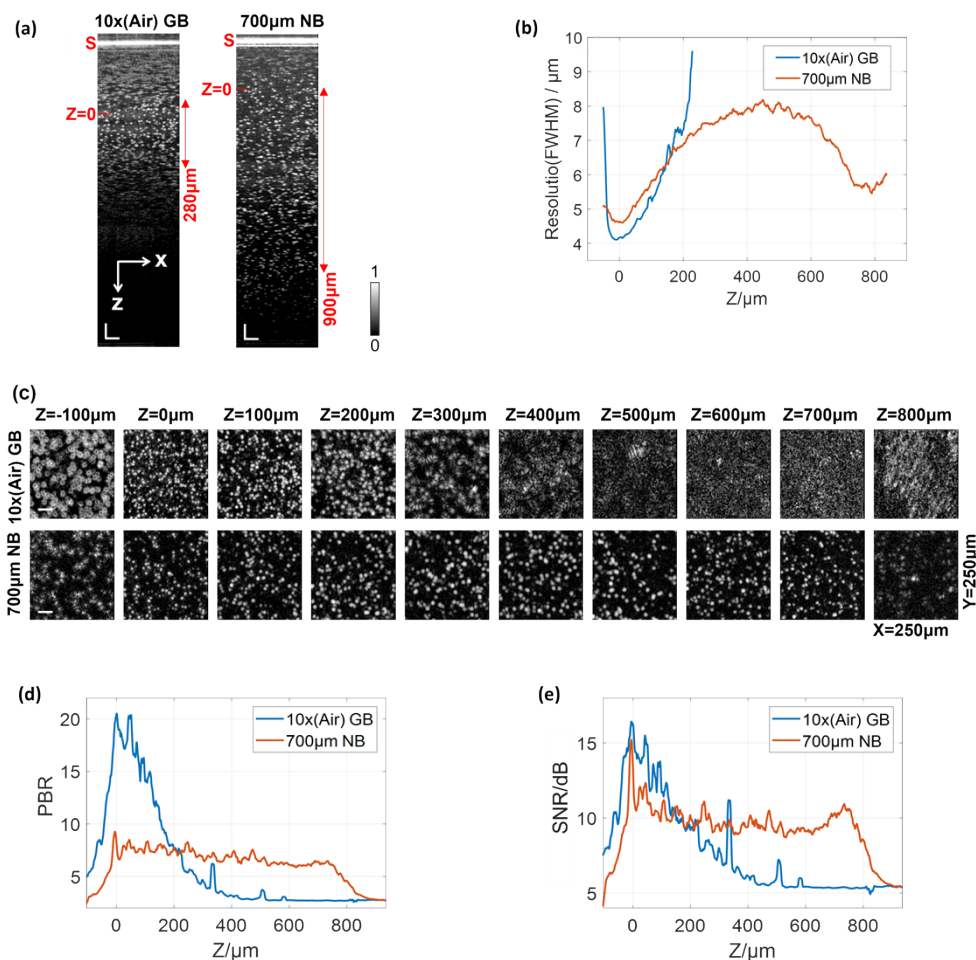

411

412 **Fig.S17** The images of 0.8µm microbeads captured by the OCT with Gaussian beam (10x dry  
 413 objective, LSM02-BB, Thorlabs) and 700µm×8µm NB. The beam profiles are given in  
 414 Supplementary Fig.9. 700µm×8µm NB here and 600µm×7.5µm NB in Supplementary Fig.9  
 415 were generated by the same diffractive optical element. The size changes because the  
 416 ultrasound gel used to contain the microbeads has a refractive index about 1.33, which is  
 417 larger than that of air (=1). (a) The B-scan images. The depth range where the beads are  
 418 clearly imaged is 280µm for Gaussian beam and 880µm for 700µm NB. S, the sample  
 419 surface. Scale bar, 50µm. (b) The resolution profiles. 700µm×8µm NB has a resolution  
 420 varying between 4.5µm (at the ends of the beam) and 8µm (in the middle). The resolution of  
 421 the Gaussian beam is down to 4µm but increases rapidly to 9.6µm at 230µm depth, and the

422 beads become indistinguishable in the depths deeper than  $230\mu\text{m}$  due to its resolution loss. (c)  
423 XY images. In Gaussian imaging, the beads located between  $z = 0$  and  $z = 200\mu\text{m}$  can  
424 produce complete circular profiles. For  $700\mu\text{m}$  NB, the range is from  $z = 0$  to  $z = 700\mu\text{m}$ .  
425 (d) The peak-to-background ratios (PBRs) along depth and (e) the signal-to-noise ratios (SNR) in  
426 the 3D bead images. In the depth range from  $200\mu\text{m}$  to  $800\mu\text{m}$ , the NB outperforms the  
427 focused Gaussian beam.  $\text{PBR} = (\text{peak intensity} - \text{average background intensity}) \div \text{average}$   
428  $\text{background intensity}$ ,  $\text{SNR} = (\text{peak intensity} - \text{average background intensity}) \div \text{standard}$   
429  $\text{deviation of background intensity}$ . Scale bar,  $50\mu\text{m}$ .  
430
